# Supplementary material for: Improved interaction energy benchmarks for dimers of biological relevance
Source: Royal Society of Chemistry journal article supplement (doi:10.1039/b926808a), 2010-01-01
Supplement: b926808a.pdf [file b926808a.pdf]

**Supplementary information for: “Improved interaction energy  
benchmarks for dimers of biological relevance”**

Rafał Podeszwa

*Institute of Chemistry, University of Silesia,  
Szkołna 9, 40-006 Katowice, Poland and  
Department of Physics and Astronomy,  
University of Delaware, Newark, Delaware 19716*

Konrad Patkowski and Krzysztof Szalewicz

*Department of Physics and Astronomy,  
University of Delaware, Newark, Delaware 19716*

(Dated: March 23, 2010)

TABLE 1: Interaction energies (in kcal/mol) and estimated errors for the S22 database.

| #                                                  | Complex (symmetry)                                                       | SCF <sup>a</sup> |         |         | MP2 <sup>b</sup> |         |         |         |                   |                   |
|----------------------------------------------------|--------------------------------------------------------------------------|------------------|---------|---------|------------------|---------|---------|---------|-------------------|-------------------|
|                                                    |                                                                          | aTZ              | aQZ     | a5Z     | aTZ              | aQZ     | a5Z     | CBS(TQ) | CBS(Q5)           | %err <sup>c</sup> |
| Hydrogen-bonded complexes                          |                                                                          |                  |         |         |                  |         |         |         |                   |                   |
| 1                                                  | (NH <sub>3</sub> ) <sub>2</sub> ( <i>C</i> <sub>2h</sub> )               | -1.397           | -1.406  | -1.407  | -2.989           | -3.088  | -3.121  | -3.156  | -3.154            | 0.06%             |
| 2                                                  | (H <sub>2</sub> O) <sub>2</sub> ( <i>C</i> <sub>s</sub> )                | -3.547           | -3.585  | -3.585  | -4.685           | -4.855  | -4.904  | -4.961  | -4.955            | 0.12%             |
| 3                                                  | Formic acid dimer ( <i>C</i> <sub>s</sub> )                              | -15.185          | -15.283 | -15.294 | -17.544          | -18.137 | -18.330 | -18.522 | -18.525           | -0.01%            |
| 4                                                  | Formamide dimer ( <i>C</i> <sub>2h</sub> )                               | -12.097          | -12.185 | -12.189 | -15.023          | -15.493 | -15.639 | -15.794 | -15.789           | 0.03%             |
| 5                                                  | Uracil dimer ( <i>C</i> <sub>2h</sub> )                                  | -16.198          | -16.272 |         | -19.594          | -20.065 |         | -20.372 |                   |                   |
| 6                                                  | 2-pyridone · 2-aminopyridine ( <i>C</i> <sub>1</sub> )                   | -10.425          | -10.478 |         | -16.633          | -17.059 |         | -17.344 |                   |                   |
| 7                                                  | Adenine · Thymine WC ( <i>C</i> <sub>1</sub> )                           | -10.004          | -10.058 |         | -15.792          | -16.229 |         | -16.522 |                   |                   |
| Complexes with predominant dispersion contribution |                                                                          |                  |         |         |                  |         |         |         |                   |                   |
| 8                                                  | (CH <sub>4</sub> ) <sub>2</sub> ( <i>D</i> <sub>3d</sub> )               | 0.371            | 0.368   | 0.367   | -0.455           | -0.477  | -0.485  | -0.492  | -0.493            | -0.11%            |
| 9                                                  | (C <sub>2</sub> H <sub>4</sub> ) <sub>2</sub> ( <i>D</i> <sub>2d</sub> ) | 0.835            | 0.829   | 0.828   | -1.456           | -1.532  | -1.555  | -1.584  | -1.579            | 0.33%             |
| 10                                                 | Benzene · CH <sub>4</sub> ( <i>C</i> <sub>3</sub> )                      | 1.177            | 1.170   | 1.169   | -1.700           | -1.769  | -1.790  | -1.815  | -1.812            | 0.18%             |
| 11                                                 | Benzene dimer ( <i>C</i> <sub>2h</sub> )                                 | 5.367            | 5.358   | 5.355   | -4.693           | -4.846  | -4.901  | -4.954  | -4.955            | -0.03%            |
| 12                                                 | Pyrazine dimer ( <i>C</i> <sub>s</sub> )                                 | 4.199            | 4.189   | 4.183   | -6.565           | -6.748  | -6.831  | -6.877  | -6.913            | -0.52%            |
| 13                                                 | Uracil dimer ( <i>C</i> <sub>2</sub> )                                   | 0.069            | 0.050   |         | -10.605          | -10.890 |         | -11.088 |                   |                   |
| 14                                                 | Indole · Benzene ( <i>C</i> <sub>1</sub> )                               | 7.052            | 7.043   | 7.038   | -7.728           | -7.932  | -8.006  | -8.077  | -8.081            | -0.04%            |
| 15                                                 | Adenine · Thymine stack ( <i>C</i> <sub>1</sub> )                        | 3.314            | 3.296   |         | -14.235          | -14.586 |         | -14.834 |                   |                   |
| Mixed complexes                                    |                                                                          |                  |         |         |                  |         |         |         |                   |                   |
| 16                                                 | Ethene · ethyne ( <i>C</i> <sub>2v</sub> )                               | -0.432           | -0.432  | -0.431  | -1.581           | -1.627  | -1.644  | -1.661  | -1.662            | -0.08%            |
| 17                                                 | Benzene · H <sub>2</sub> O ( <i>C</i> <sub>s</sub> )                     | -0.931           | -0.937  | -0.938  | -3.349           | -3.459  | -3.497  | -3.537  | -3.537            | 0.00%             |
| 18                                                 | Benzene · NH <sub>3</sub> ( <i>C</i> <sub>s</sub> )                      | 0.187            | 0.180   | 0.179   | -2.512           | -2.599  | -2.627  | -2.658  | -2.656            | 0.11%             |
| 19                                                 | Benzene · HCN ( <i>C</i> <sub>s</sub> )                                  | -1.996           | -1.991  | -1.990  | -4.920           | -5.057  | -5.111  | -5.159  | -5.169            | -0.19%            |
| 20                                                 | Benzene dimer ( <i>C</i> <sub>2v</sub> )                                 | 1.518            | 1.517   | 1.516   | -3.454           | -3.554  | -3.589  | -3.626  | -3.626            | -0.02%            |
| 21                                                 | Indole · Benzene T-shape ( <i>C</i> <sub>s</sub> )                       | 0.285            | 0.289   |         | -6.707           | -6.860  |         | -6.975  |                   |                   |
| 22                                                 | Phenol dimer ( <i>C</i> <sub>1</sub> )                                   | -1.801           | -1.838  |         | -7.353           | -7.587  |         | -7.740  |                   |                   |
|                                                    |                                                                          |                  |         |         |                  |         |         |         | avg: <sup>d</sup> | 0.12%             |

<sup>a</sup> RI-SCF results in aug-cc-pVXZ basis set,  $X = 3, 4, 5$ .

<sup>b</sup> RI-MP2 results in aug-cc-pVXZ basis set,  $X = 3, 4, 5$  and CBS extrapolations.

<sup>c</sup> Percentage error of (TQ) CBS MP2 extrapolation with respect to the (Q5) one.

<sup>d</sup> Average magnitude of percentage deviation of the (TQ) CBS MP2 extrapolations with respect to (Q5) CBS.

TABLE 2: Interaction energies (in kcal/mol) and estimated errors for the S22 database, cont.

| # Complex (symmetry)                                                       | MP2   |                     |                  |                  | $E_{\text{int}}^e$ | $\delta E_{\text{int}}^{\text{CCSD(T)}}^f$ | err <sup>g</sup>   | %err <sup>h</sup> | %unc <sup>i</sup> |
|----------------------------------------------------------------------------|-------|---------------------|------------------|------------------|--------------------|--------------------------------------------|--------------------|-------------------|-------------------|
|                                                                            | $X^a$ | aXZ+mb <sup>b</sup> | CBS <sup>c</sup> | err <sup>d</sup> |                    |                                            |                    |                   |                   |
| Hydrogen bonded complexes                                                  |       |                     |                  |                  |                    |                                            |                    |                   |                   |
| 1 (NH <sub>3</sub> ) <sub>2</sub> ( <i>C</i> <sub>2h</sub> )               | 4     | -3.105              | -3.154           | -1.55%           | -3.145             | 0.009                                      | 0.000              | 0.00%             | 0.55%             |
| 2 (H <sub>2</sub> O) <sub>2</sub> ( <i>C</i> <sub>s</sub> )                | 4     | -4.877              | -4.955           | -1.58%           | -5.004             | -0.049                                     | -0.001             | 0.02%             | 0.62%             |
| 3 Formic acid dimer ( <i>C</i> <sub>s</sub> )                              | 3     | -17.682             | -18.525          | -4.55%           | -18.751            | -0.226                                     | -0.010             | 0.05%             | 0.53%             |
| 4 Formamide dimer ( <i>C</i> <sub>2h</sub> )                               | 3     | -15.121             | -15.789          | -4.23%           | -16.063            | -0.274                                     | -0.012             | 0.07%             | 0.59%             |
| 5 Uracil dimer ( <i>C</i> <sub>2h</sub> )                                  | 3     | -19.696             | -20.372          | -3.32%           | -20.643            | -0.271                                     | -0.009             | 0.04%             | 0.77%             |
| 6 2-pyridone · 2-aminopyridine ( <i>C</i> <sub>1</sub> )                   | 3     | -16.715             | -17.344          | -3.63%           | -16.938            | 0.406                                      | 0.015              | -0.09%            | 0.77%             |
| 7 Adenine · Thymine WC ( <i>C</i> <sub>1</sub> )                           | 2     | -15.215             | -16.522          | -7.91%           | -16.554            | -0.033                                     | -0.003             | 0.02%             | 0.77%             |
| Complexes with predominant dispersion contribution                         |       |                     |                  |                  |                    |                                            |                    |                   |                   |
| 8 (CH <sub>4</sub> ) <sub>2</sub> ( <i>D</i> <sub>3d</sub> )               | 4     | -0.485              | -0.493           | -1.44%           | -0.529             | -0.037                                     | -0.001             | 0.10%             | 0.34%             |
| 9 (C <sub>2</sub> H <sub>4</sub> ) <sub>2</sub> ( <i>D</i> <sub>2d</sub> ) | 4     | -1.545              | -1.579           | -2.12%           | -1.482             | 0.096                                      | 0.002              | -0.14%            | 0.62%             |
| 10 Benzene · CH <sub>4</sub> ( <i>C</i> <sub>3</sub> )                     | 3     | -1.753              | -1.812           | -3.26%           | -1.448             | 0.364                                      | 0.012              | -0.82%            | 1.02%             |
| 11 Benzene dimer ( <i>C</i> <sub>2h</sub> )                                | 3     | -4.782              | -4.955           | -3.49%           | -2.655             | 2.301                                      | 0.080              | -3.02%            | 3.08%             |
| 12 Pyrazine dimer ( <i>C</i> <sub>s</sub> )                                | 3     | -6.753              | -6.913           | -2.31%           | -4.256             | 2.658                                      | 0.062              | -1.45%            | 1.64%             |
| 13 Uracil dimer ( <i>C</i> <sub>2</sub> )                                  | 3     | -10.730             | -11.088          | -3.23%           | -9.783             | 1.305                                      | 0.042              | -0.43%            | 0.88%             |
| 14 Indole · Benzene ( <i>C</i> <sub>1</sub> )                              | 3     | -7.824              | -8.081           | -3.18%           | -4.523             | 3.557                                      | 0.113              | -2.50%            | 2.54%             |
| 15 Adenine · Thymine stack ( <i>C</i> <sub>1</sub> )                       | 2     | -13.636             | -14.834          | -8.08%           | -11.857            | 2.978                                      | 0.241              | -2.03%            | 2.17%             |
| Mixed complexes                                                            |       |                     |                  |                  |                    |                                            |                    |                   |                   |
| 16 Ethene · ethyne ( <i>C</i> <sub>2v</sub> )                              | 4     | -1.637              | -1.662           | -1.54%           | -1.503             | 0.159                                      | 0.002              | -0.16%            | 0.52%             |
| 17 Benzene · H <sub>2</sub> O ( <i>C</i> <sub>s</sub> )                    | 3     | -3.424              | -3.537           | -3.17%           | -3.280             | 0.257                                      | 0.008              | -0.25%            | 0.63%             |
| 18 Benzene · NH <sub>3</sub> ( <i>C</i> <sub>s</sub> )                     | 3     | -2.573              | -2.656           | -3.11%           | -2.319             | 0.336                                      | 0.010              | -0.45%            | 0.74%             |
| 19 Benzene · HCN ( <i>C</i> <sub>s</sub> )                                 | 3     | -5.005              | -5.169           | -3.18%           | -4.540             | 0.629                                      | 0.020              | -0.44%            | 0.75%             |
| 20 Benzene dimer ( <i>C</i> <sub>2v</sub> )                                | 3     | -3.519              | -3.626           | -2.96%           | -2.717             | 0.909                                      | 0.027              | -0.99%            | 1.15%             |
| 21 Indole · Benzene T-shape ( <i>C</i> <sub>s</sub> )                      | 3     | -6.790              | -6.975           | -2.65%           | -5.627             | 1.348                                      | 0.036              | -0.63%            | 1.00%             |
| 22 Phenol dimer ( <i>C</i> <sub>1</sub> )                                  | 3     | -7.465              | -7.740           | -3.56%           | -7.097             | 0.643                                      | 0.023              | -0.32%            | 0.83%             |
|                                                                            |       |                     |                  |                  |                    |                                            | avg <sup>j</sup> : | 0.64%             | 1.02%             |

<sup>a</sup> The aug-cc-pVXZ+mb level used in the MP2 and CCSD(T) calculations.

<sup>b</sup> The MP2 aug-cc-pVXZ+mb energy.

<sup>c</sup> The CBS extrapolated values, same as in the column with the identical header in Table 1 of the main text.

<sup>d</sup> Percentage error of the MP2/aug-cc-pVXZ+mb result with respect to MP2/CBS.

<sup>e</sup> The total interaction energies calculated using Eq. (1) of the main paper, same as in the column with the identical header in Table 1 of the main text.

<sup>f</sup> Calculated in the aug-cc-pVXZ+mb basis set.

<sup>g</sup> Error of  $\delta E_{\text{int}}^{\text{CCSD(T)}}$  estimated by multiplying the MP2/aug-cc-pVXZ+mb error (column 6) by  $\delta E_{\text{int}}^{\text{CCSD(T)}}$ .

<sup>h</sup> Ratio of the previous column to  $E_{\text{int}}$ , in percent.

<sup>i</sup> Total percentage uncertainties computed as  $\sqrt{\sigma_{\text{MP2}}^2 + \sigma_{\delta_{\text{CCSD(T)}}}^2 + \sigma_{\text{FC}}^2 + \sigma_{\text{exc}}^2}$ , where  $\sigma_{\text{MP2}}$  is the estimated MP2 CBS error (last column of Table 1) or 0.5%,  $\sigma_{\delta_{\text{CCSD(T)}}$  is the preceding column,  $\sigma_{\text{FC}}$  are the values in the last column of Table 3 or 0.5%, and  $\sigma_{\text{exc}} = 0.3\%$  are the uncertainties resulting from excitations beyond the CCSD(T) level.

<sup>j</sup> Average magnitude of the percentage deviations in this column.

TABLE 3: CCSD(T) frozen-core and all-electron results (in kcal/mol). Aug-cc-pCVTZ+mb basis set was used for all studied systems, except for indole-benzene, where aug-cc-pCVDZ+mb was used.

| #                                                  | Complex (symmetry)                                                       | AE <sup>a</sup> | FC <sup>b</sup>    | %diff <sup>c</sup> |
|----------------------------------------------------|--------------------------------------------------------------------------|-----------------|--------------------|--------------------|
| Hydrogen bonded complexes                          |                                                                          |                 |                    |                    |
| 1                                                  | (NH <sub>3</sub> ) <sub>2</sub> ( <i>C</i> <sub>2h</sub> )               | -3.068          | -3.053             | 0.46%              |
| 2                                                  | (H <sub>2</sub> O) <sub>2</sub> ( <i>C</i> <sub>s</sub> )                | -4.880          | -4.854             | 0.53%              |
| 3                                                  | Formic acid dimer ( <i>C</i> <sub>s</sub> )                              | -18.004         | -17.927            | 0.43%              |
| 4                                                  | Formamide dimer ( <i>C</i> <sub>2h</sub> )                               |                 |                    |                    |
| 5                                                  | Uracil dimer ( <i>C</i> <sub>2h</sub> )                                  |                 |                    |                    |
| 6                                                  | 2-pyridone · 2-aminopyridine ( <i>C</i> <sub>1</sub> )                   |                 |                    |                    |
| 7                                                  | Adenine · Thymine WC ( <i>C</i> <sub>1</sub> )                           |                 |                    |                    |
|                                                    | MUE/MURE                                                                 |                 |                    |                    |
| Complexes with predominant dispersion contribution |                                                                          |                 |                    |                    |
| 8                                                  | (CH <sub>4</sub> ) <sub>2</sub> ( <i>D</i> <sub>3d</sub> )               | -0.520          | -0.520             | -0.03%             |
| 9                                                  | (C <sub>2</sub> H <sub>4</sub> ) <sub>2</sub> ( <i>D</i> <sub>2d</sub> ) | -1.432          | -1.426             | 0.40%              |
| 10                                                 | Benzene · CH <sub>4</sub> ( <i>C</i> <sub>3</sub> )                      |                 |                    |                    |
| 11                                                 | Benzene dimer ( <i>C</i> <sub>2h</sub> )                                 |                 |                    |                    |
| 12                                                 | Pyrazine dimer ( <i>C</i> <sub>s</sub> )                                 |                 |                    |                    |
| 13                                                 | Uracil dimer ( <i>C</i> <sub>2</sub> )                                   |                 |                    |                    |
| 14                                                 | Indole · Benzene ( <i>C</i> <sub>1</sub> )                               | -4.028          | -4.013             | 0.36%              |
| 15                                                 | Adenine · Thymine stack ( <i>C</i> <sub>1</sub> )                        |                 |                    |                    |
|                                                    | MUE/MURE                                                                 |                 |                    |                    |
| Mixed complexes                                    |                                                                          |                 |                    |                    |
| 16                                                 | Ethene · ethyne ( <i>C</i> <sub>2v</sub> )                               | -1.465          | -1.460             | 0.38%              |
| 17                                                 | Benzene · H <sub>2</sub> O ( <i>C</i> <sub>s</sub> )                     |                 |                    |                    |
| 18                                                 | Benzene · NH <sub>3</sub> ( <i>C</i> <sub>s</sub> )                      |                 |                    |                    |
| 19                                                 | Benzene · HCN ( <i>C</i> <sub>s</sub> )                                  |                 |                    |                    |
| 20                                                 | Benzene dimer ( <i>C</i> <sub>2v</sub> )                                 |                 |                    |                    |
| 21                                                 | Indole · Benzene T-shape ( <i>C</i> <sub>s</sub> )                       |                 |                    |                    |
| 22                                                 | Phenol dimer ( <i>C</i> <sub>1</sub> )                                   |                 |                    |                    |
|                                                    |                                                                          |                 | avg <sup>d</sup> : | 0.37%              |

<sup>a</sup> All electron.

<sup>b</sup> Frozen core.

<sup>c</sup> Percentage contribution of the AE-FC effect to the all-electron interaction energy.

<sup>d</sup> Average magnitude of the percentage deviations in this column.
